# Supplementary material for: 3D chromatin-based variant-to-gene maps across 57 human cell types reveal the cellular and genetic architecture of autoimmune disease susceptibility
Source: PubMed Central journal article supplement — medRxiv. 2025 May 20:2024.08.12.24311676. Originally published 2024 Aug 12. Preprint. [Version 2] doi: 10.1101/2024.08.12.24311676 (PMC11343244; doi:10.1101/2024.08.12.24311676), 2025-05-20

**Figure S1** - Bar-plots shows number of OCRs within 5 different categories, that were analysis across traits (A) and across cell types (B).

**A**

| trait | Total OCRs by ATAC-seq | OCRs at promoters | putative cREs | cREs $\approx$ 500 bases | OCRs not cREs |
|-------|------------------------|-------------------|---------------|--------------------------|---------------|
| GD    | 23                     | 40                | 34            | 23                       | 9             |
| ALG   | 22                     | 12                | 28            | 33                       | 11            |
| CEL   | 22                     | 7                 | 22            | 23                       | 11            |
| CRO   | 22                     | 2                 | 22            | 23                       | 10            |
| IBD   | 22                     | 2                 | 22            | 24                       | 14            |
| RA    | 21                     | 17                | 26            | 28                       | 14            |
| MS    | 21                     | 8                 | 24            | 24                       | 3             |
| UC    | 21                     | 2                 | 22            | 23                       | 8             |
| VIT   | 20                     | 11                | 17            | 22                       | 13            |
| T1D   | 19                     | 2                 | 20            | 21                       | 2             |
| HT    | 18                     | 4                 | 22            | 24                       | 5             |
| SLE   | 12                     |                   | 13            | 23                       |               |
| ECZ   | 6                      |                   | 19            | 37                       |               |
| PSO   | 5                      |                   | 3             | 2                        | 2             |
| AS    | 1                      |                   | 2             |                          | 2             |
| JJA   |                        |                   | 1             | 3                        |               |

**B**

| Cell type      | Total OCRs by ATAC-seq | OCRs at promoters | putative cREs | cREs $\approx$ 500 bases | OCRs not cREs | system |
|----------------|------------------------|-------------------|---------------|--------------------------|---------------|--------|
| Treg           | 13                     | 5                 | 13            | 14                       | 8             | immune |
| Th17           | 13                     | 5                 | 13            | 13                       | 8             |        |
| Treg_act       | 13                     | 5                 | 12            | 13                       | 6             |        |
| Th1            | 13                     | 4                 | 13            | 13                       | 7             |        |
| GCB            | 13                     | 2                 | 12            | 13                       | 3             |        |
| TFH            | 12                     | 8                 | 13            | 13                       | 9             |        |
| naiveT_8h      | 12                     | 7                 | 15            | 15                       |               |        |
| naiveT_24h     | 12                     | 5                 | 13            | 14                       | 2             |        |
| Th1_act        | 12                     | 5                 | 13            | 13                       | 6             |        |
| Th2            | 12                     | 4                 | 13            | 13                       | 3             |        |
| Tr1            | 12                     | 4                 | 11            | 13                       | 8             |        |
| Tr1_act        | 12                     | 3                 | 11            | 13                       | 9             |        |
| naiveB         | 12                     | 2                 | 9             | 13                       | 6             |        |
| Th17_act       | 11                     | 5                 | 13            | 13                       | 9             |        |
| naiveT(tonsil) | 11                     | 5                 | 12            | 13                       | 7             |        |
| Th2_act        | 11                     | 5                 | 12            | 13                       | 5             |        |
| NK             | 11                     | 3                 | 12            | 13                       | 1             |        |
| PGF            | 11                     | 3                 | 11            | 11                       | 2             |        |
| naiveT_unstim  | 11                     | 1                 | 14            | 13                       | 3             |        |
| pDC            | 10                     | 1                 | 13            | 13                       |               |        |
| cDC_CD1c       | 8                      | 1                 | 10            | 13                       |               |        |
| Monocytes      | 5                      | 1                 | 7             | 10                       |               |        |
| Enteroid       | 1                      | 1                 | 2             | 4                        | metabolic     |        |
| Hepatocytes    | 1                      | 1                 | 1             | 3                        |               | 1      |
| Myotubes       | 1                      |                   | 1             | 4                        |               |        |
| HEPG2          |                        | 2                 | 3             | 3                        |               |        |
| Osteo_hMSC     |                        | 1                 | 2             | 1                        |               |        |
| MiaPaCa        |                        | 1                 | 2             |                          |               |        |
| Adipo_hMSC     |                        | 1                 | 1             | 3                        |               |        |
| Panc1          |                        | 1                 | 1             |                          |               |        |
| Hepato_IPSC    |                        | 1                 |               |                          |               |        |
| Panc_Acir      |                        | 1                 |               |                          |               |        |
| Adipocytes     |                        |                   | 3             | 3                        |               |        |
| PreAdipo_SGBS  |                        |                   | 2             | 2                        |               |        |
| PreAdipocytes  |                        |                   | 1             | 3                        |               |        |
| Panc_Alpha(sc) |                        |                   |               | 3                        |               |        |
| Adipo_SGBS     |                        |                   |               | 2                        |               |        |
| EndoC_BH1      |                        |                   |               | 1                        |               |        |
| Microglia      |                        | 1                 | 1             | 1                        | neural        |        |
| Microglia_act  |                        | 1                 | 1             | 1                        |               |        |
| NPC_hESC       |                        | 1                 | 1             | 1                        |               |        |
| HNS_hESC       |                        | 1                 | 1             | 1                        |               |        |
| NPC_IPSC       |                        |                   | 1             | 1                        |               |        |
| Astrocytes     |                        |                   |               | 2                        |               |        |
| hESC           | 1                      | 1                 | 2             | 5                        | other         |        |
| NCIH716        | 1                      | 1                 | 1             |                          |               |        |
| Melano_YRI     |                        | 1                 | 1             |                          |               |        |
| hMSC           |                        |                   | 1             | 2                        |               |        |
| NTERA2         |                        |                   | 1             |                          |               |        |
| hTM            |                        |                   |               | 1                        |               |        |

**Figure S2 - A.** Upset-plot showing intersections of V2G SNPs implicated across 16 immune traits. **B.** Box-plot depicting numbers of genes contacted by variants for each trait in each cell type category.

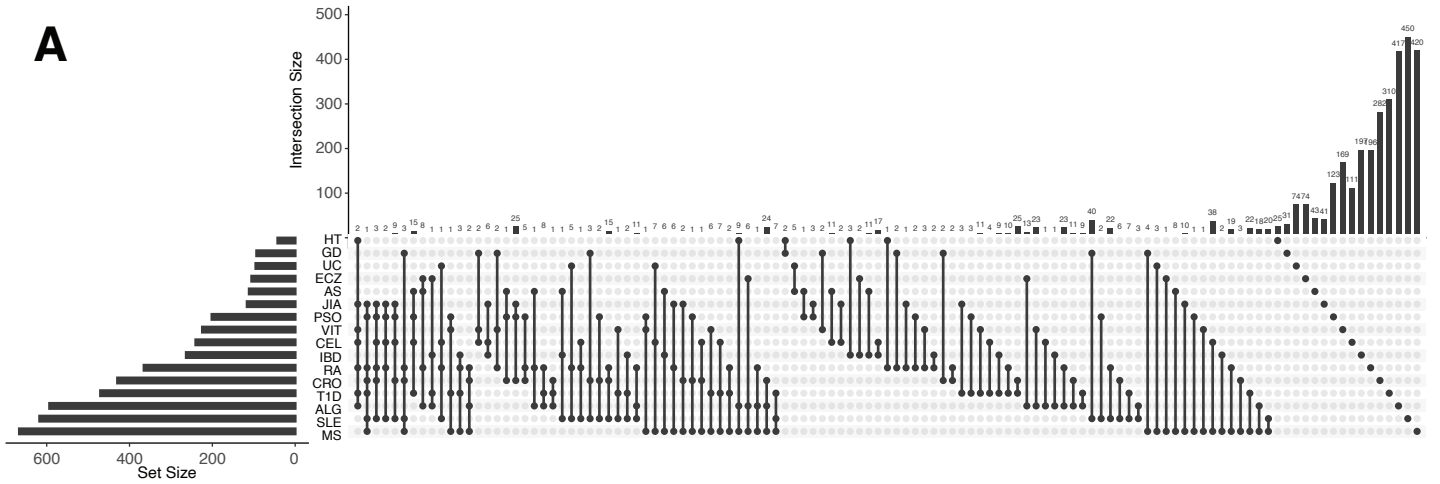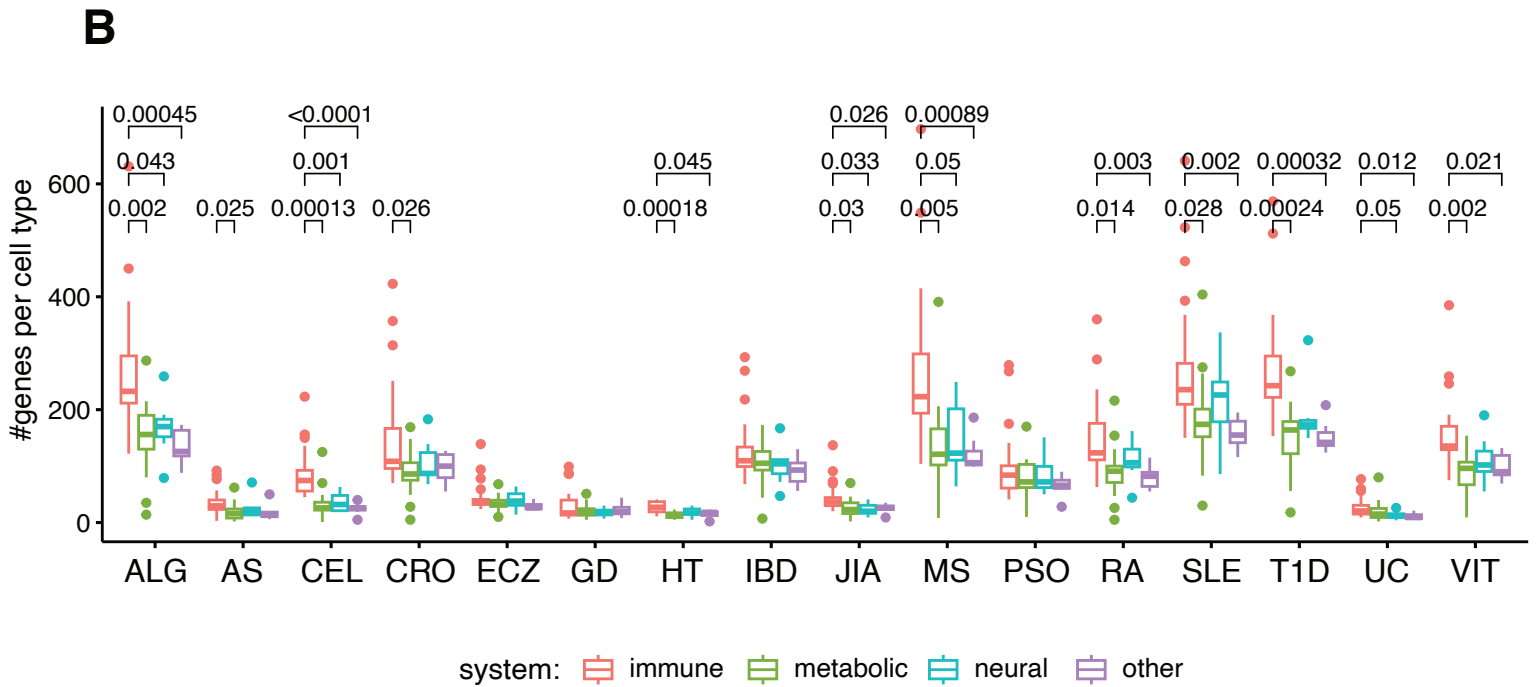

**Figure S3 - A.** Upset-plot showing intersections of V2G genes implicated in any cell type across 16 immune traits. **B.** Upset-plot depicting intersections of V2G genes for any trait across the cell types listed.

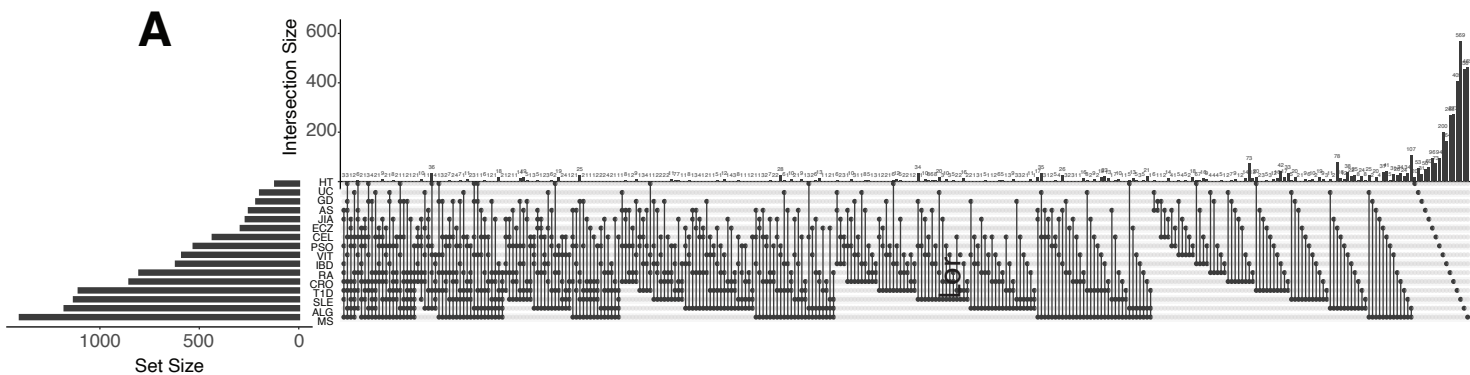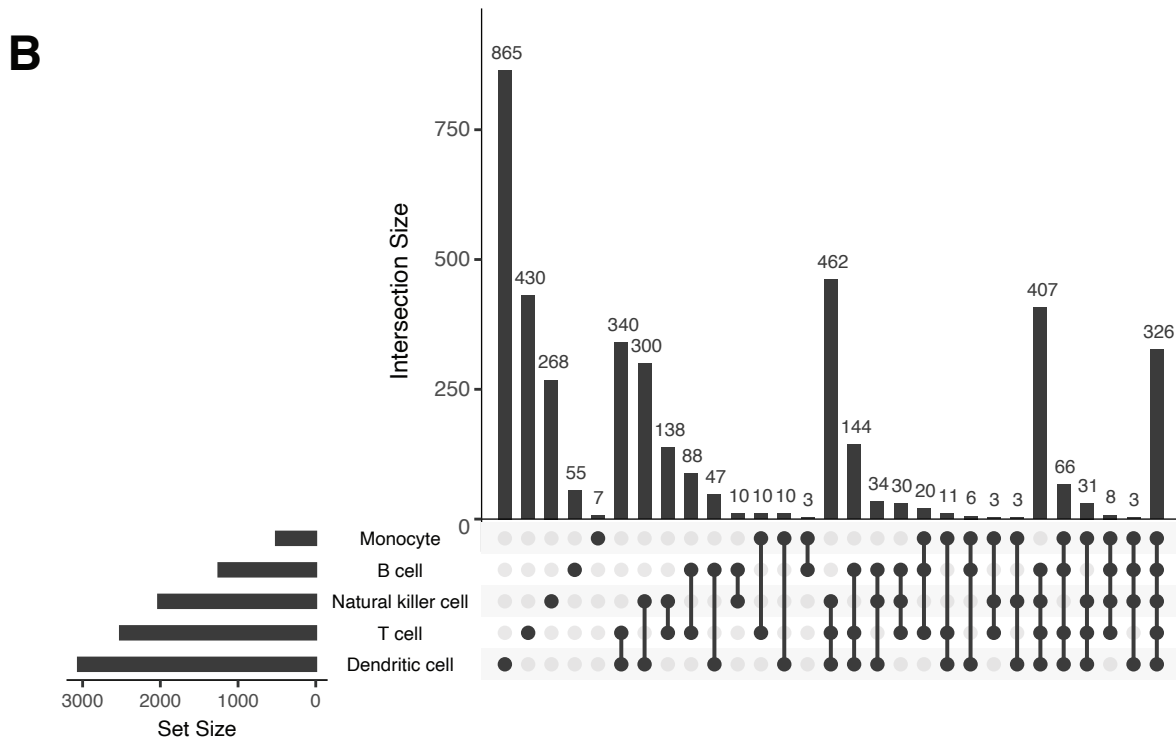

**Figure S4** - Degree of overlap of implicated variants (A) and target genes (B) across cell types.

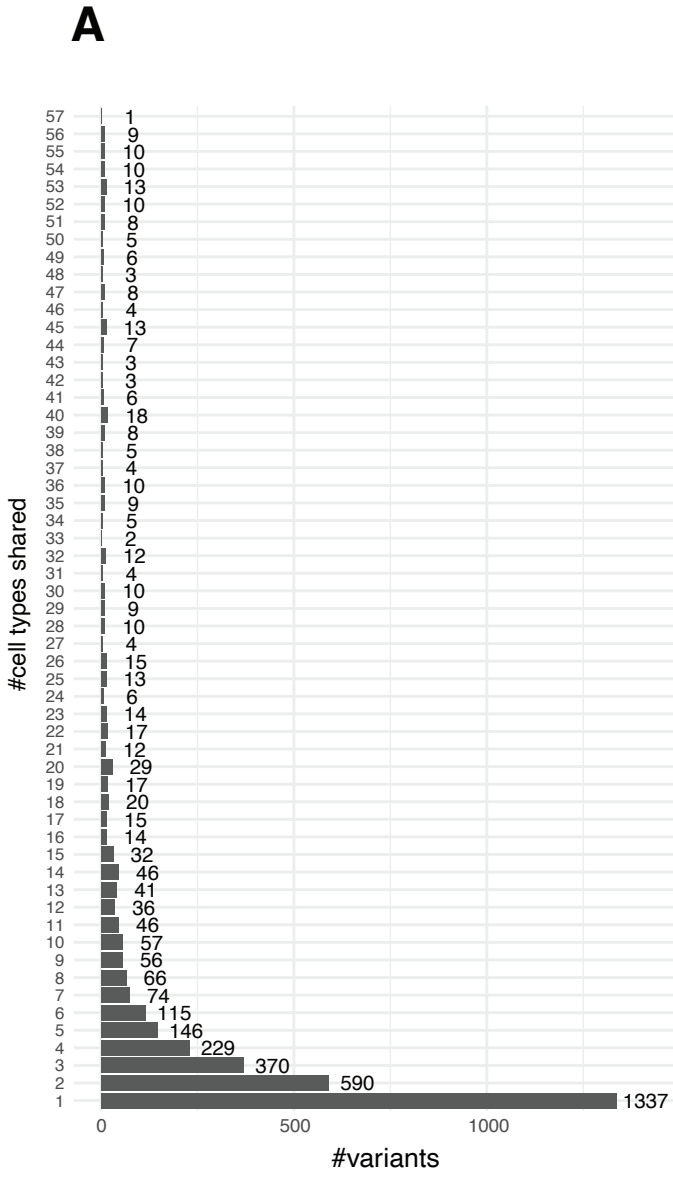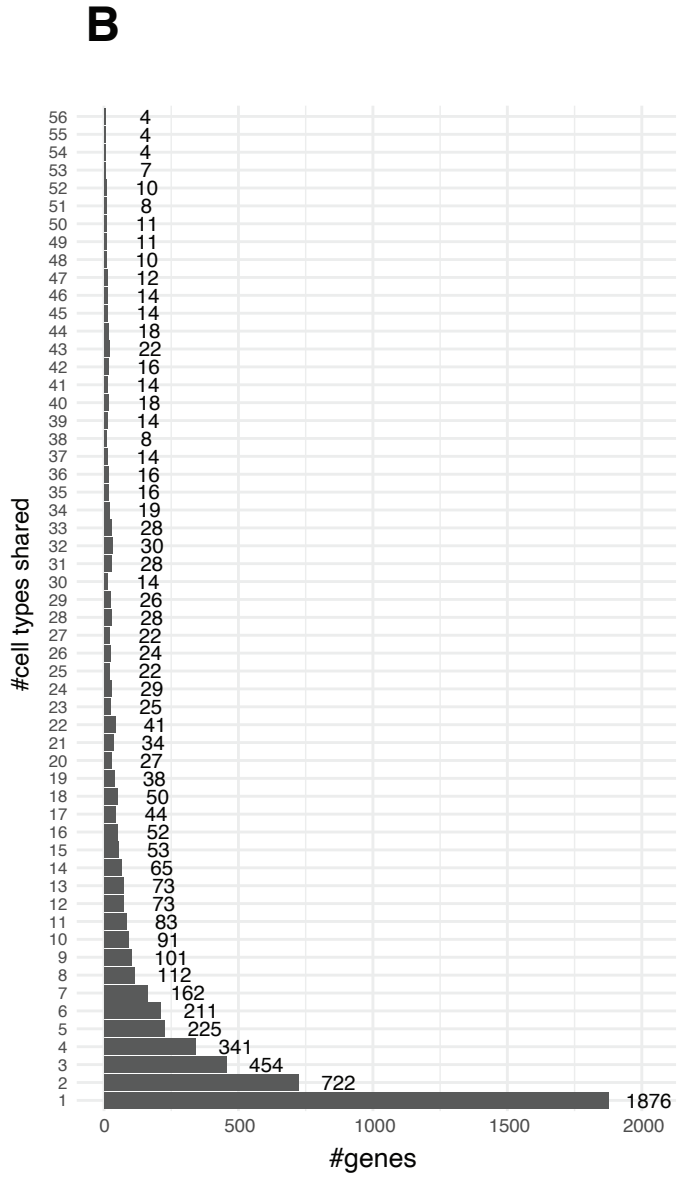

**Figure S5 - Cytokine/receptor gene enrichment across trait and cell type (A) and in KEGG pathway (B).**

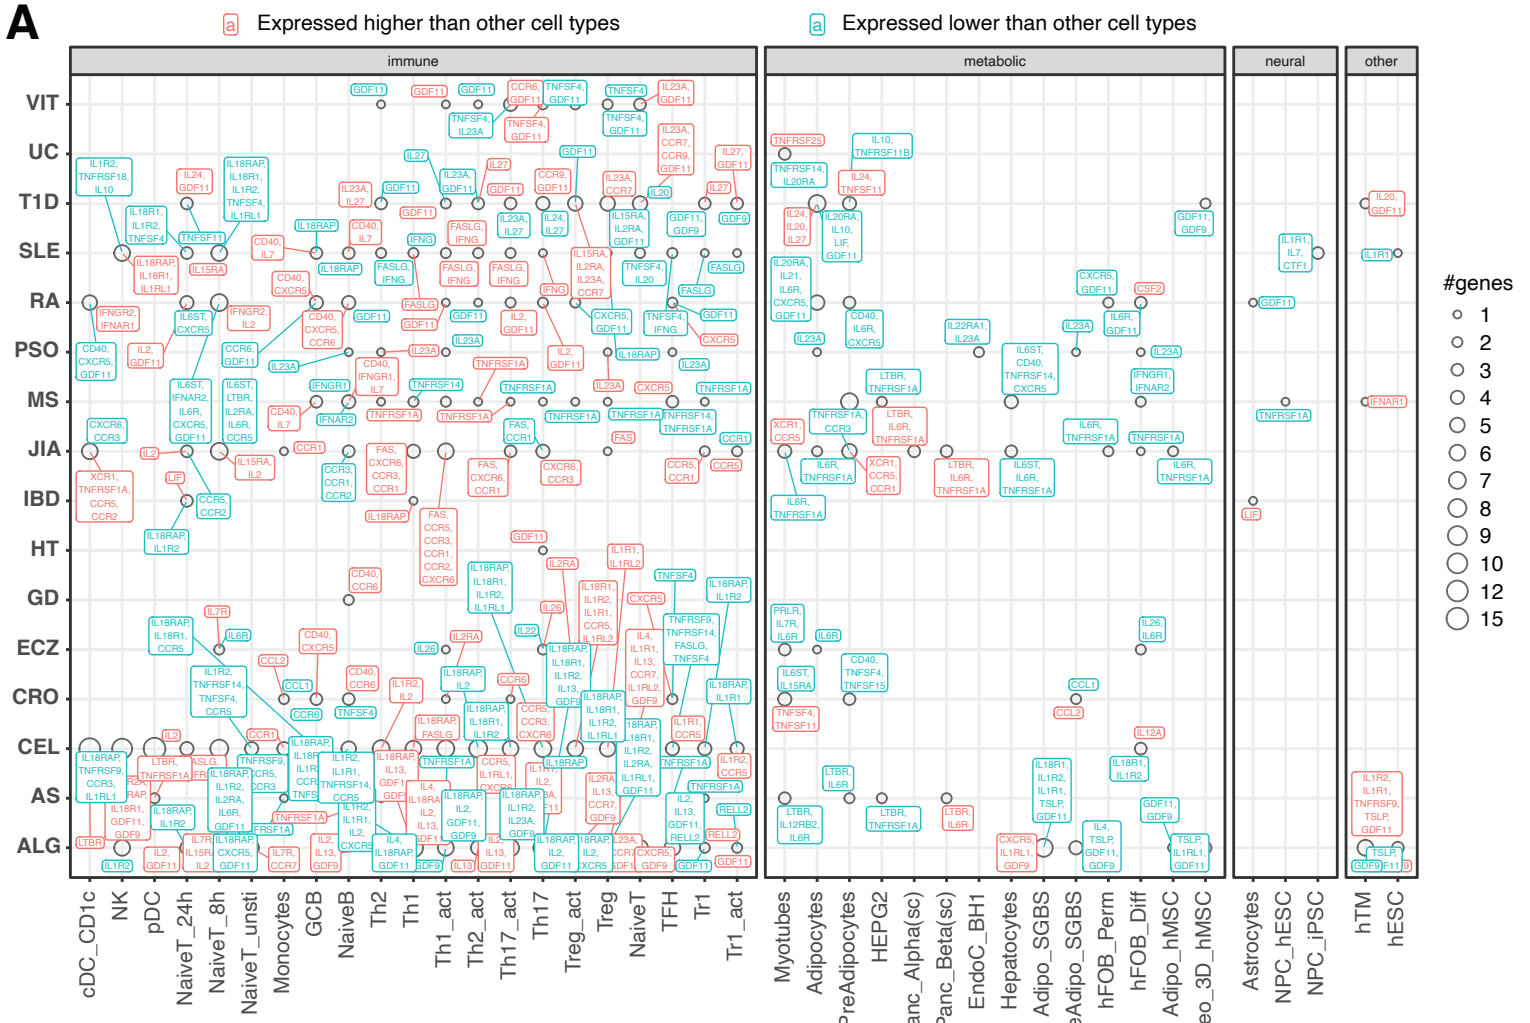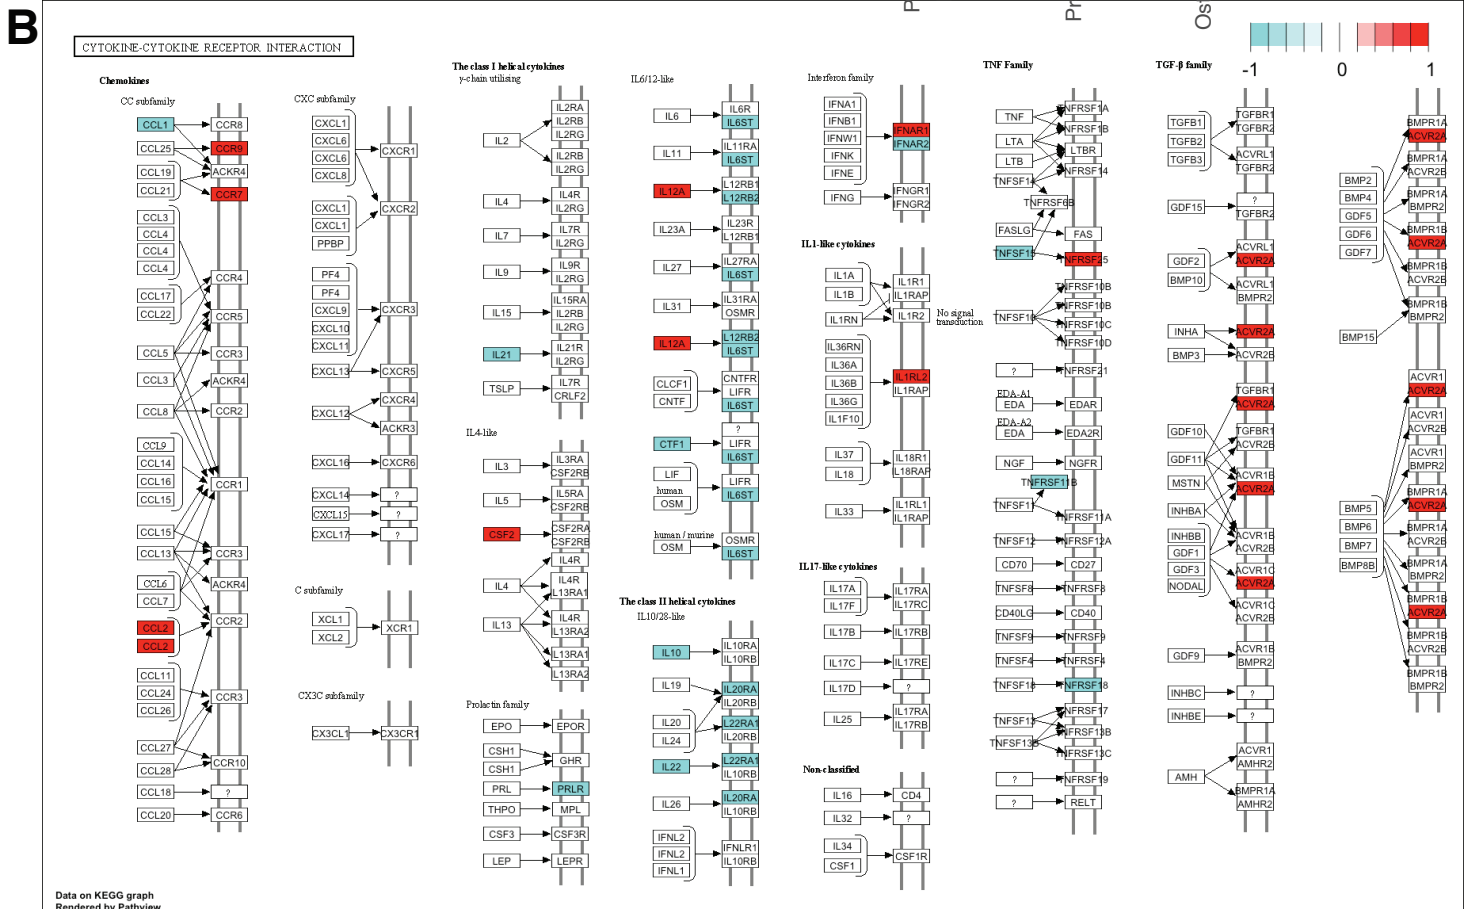

**Figure S6** - Salmonella infection gene enrichment across trait and cell type (A) and in KEGG pathway (B).

**A**

a Expressed higher than other cell types

a Expressed lower than other cell types

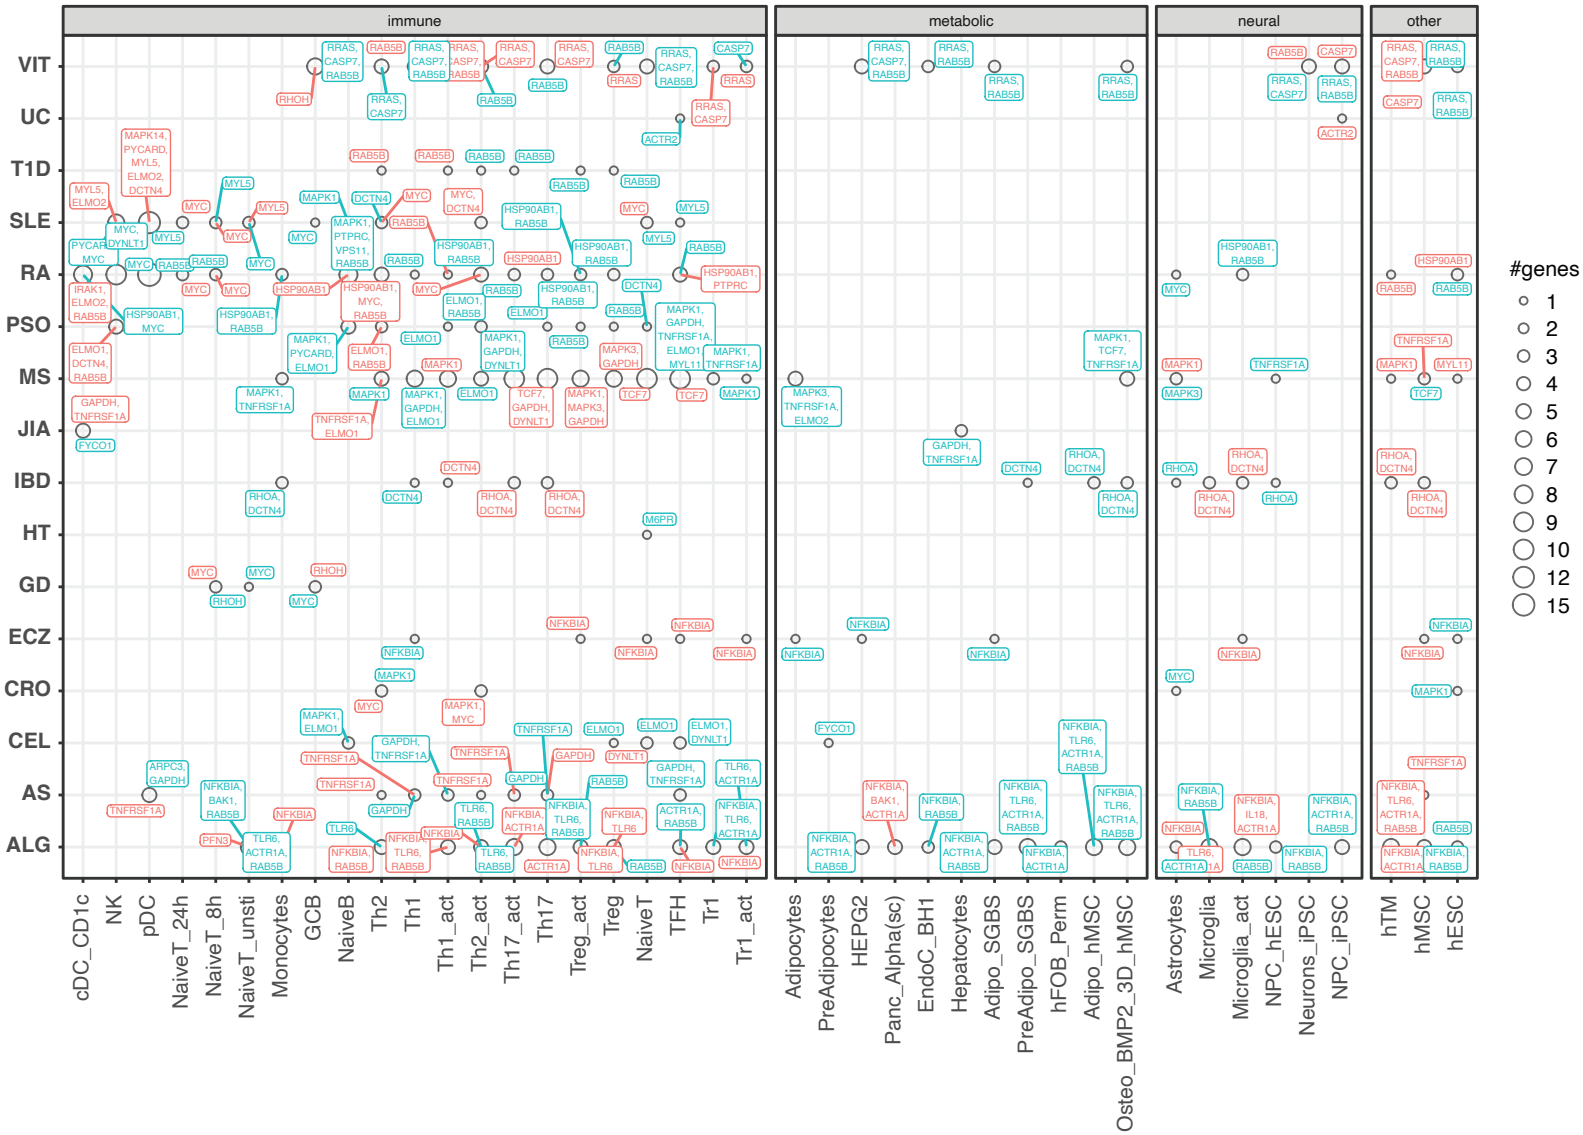

**Figure S6 - Salmonella infection gene enrichment across trait and cell type (A) and in KEGG pathway (B).**

**B**

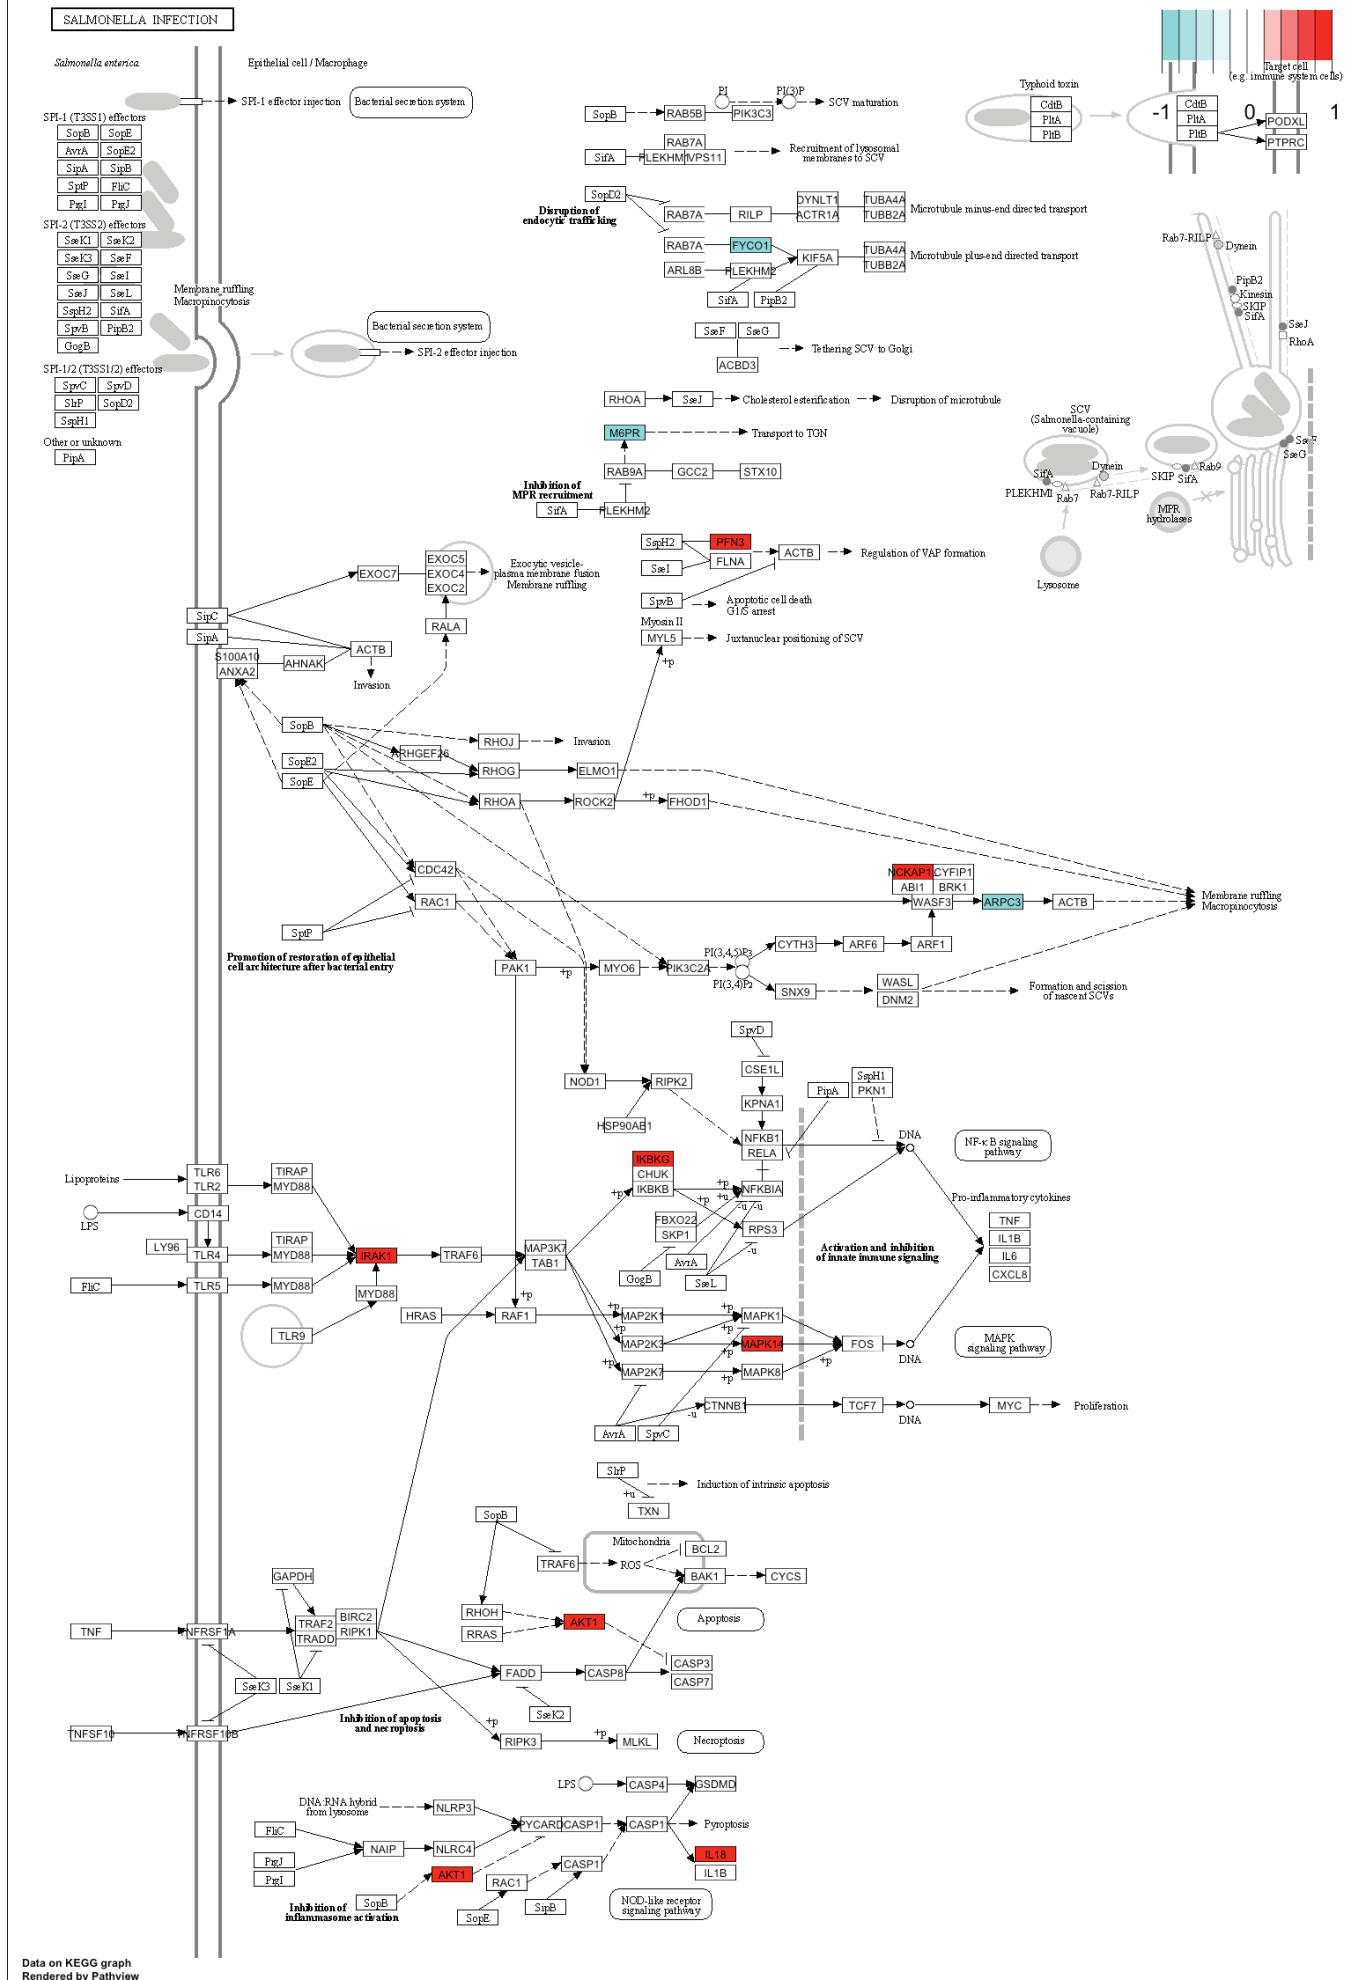

**Figure S7** - Sharing of V2G genes in enteroids across UC, CRO, and IBD (A). Gene ontology (B) and pathway enrichment (C) across each trait are shown.

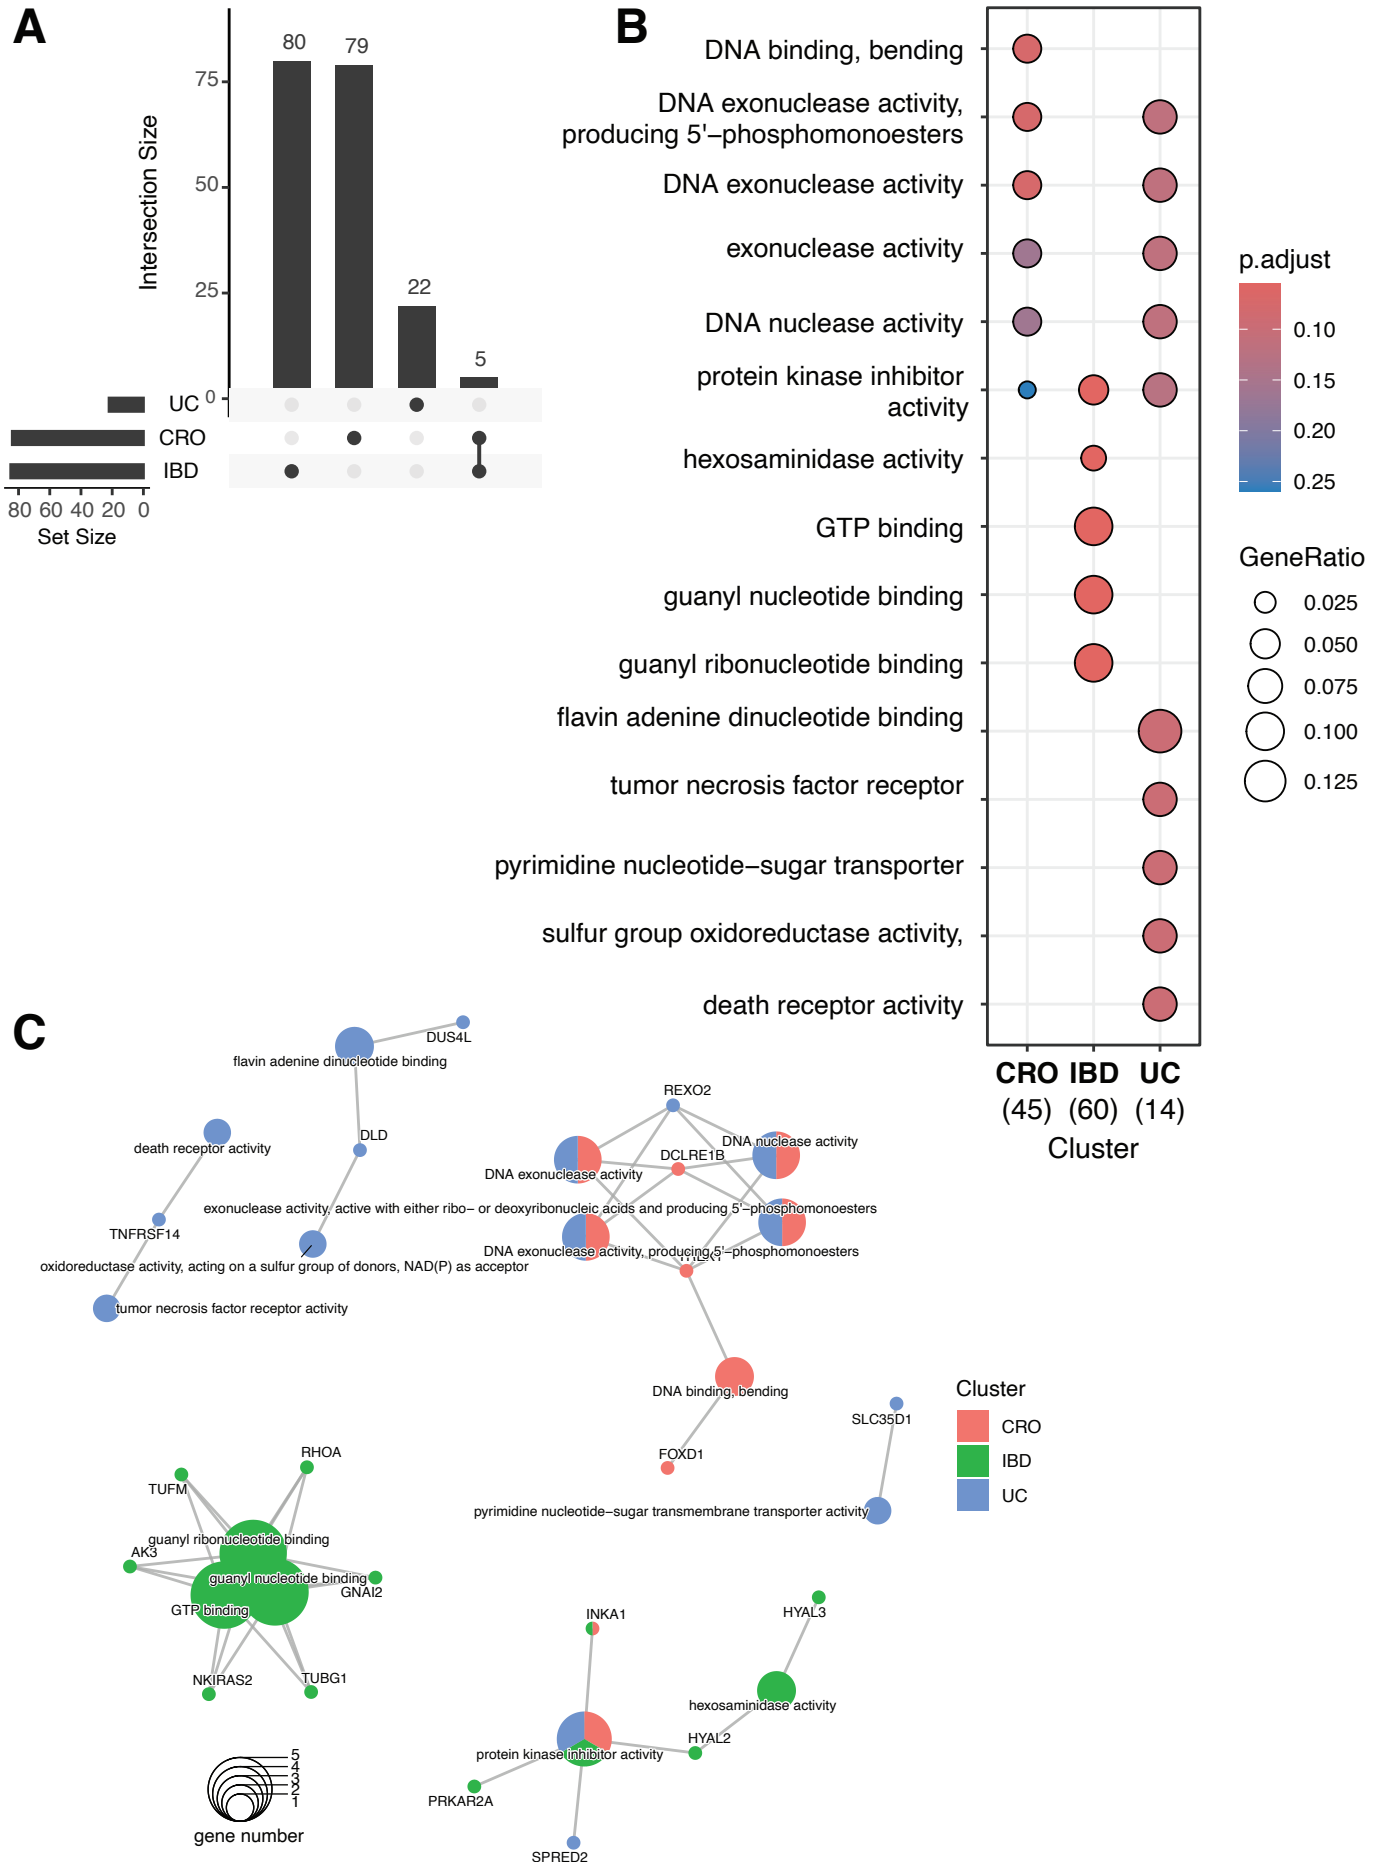



**Figure S8** - Gene ontology enrichment of cell type-specific V2G genes across cell type.

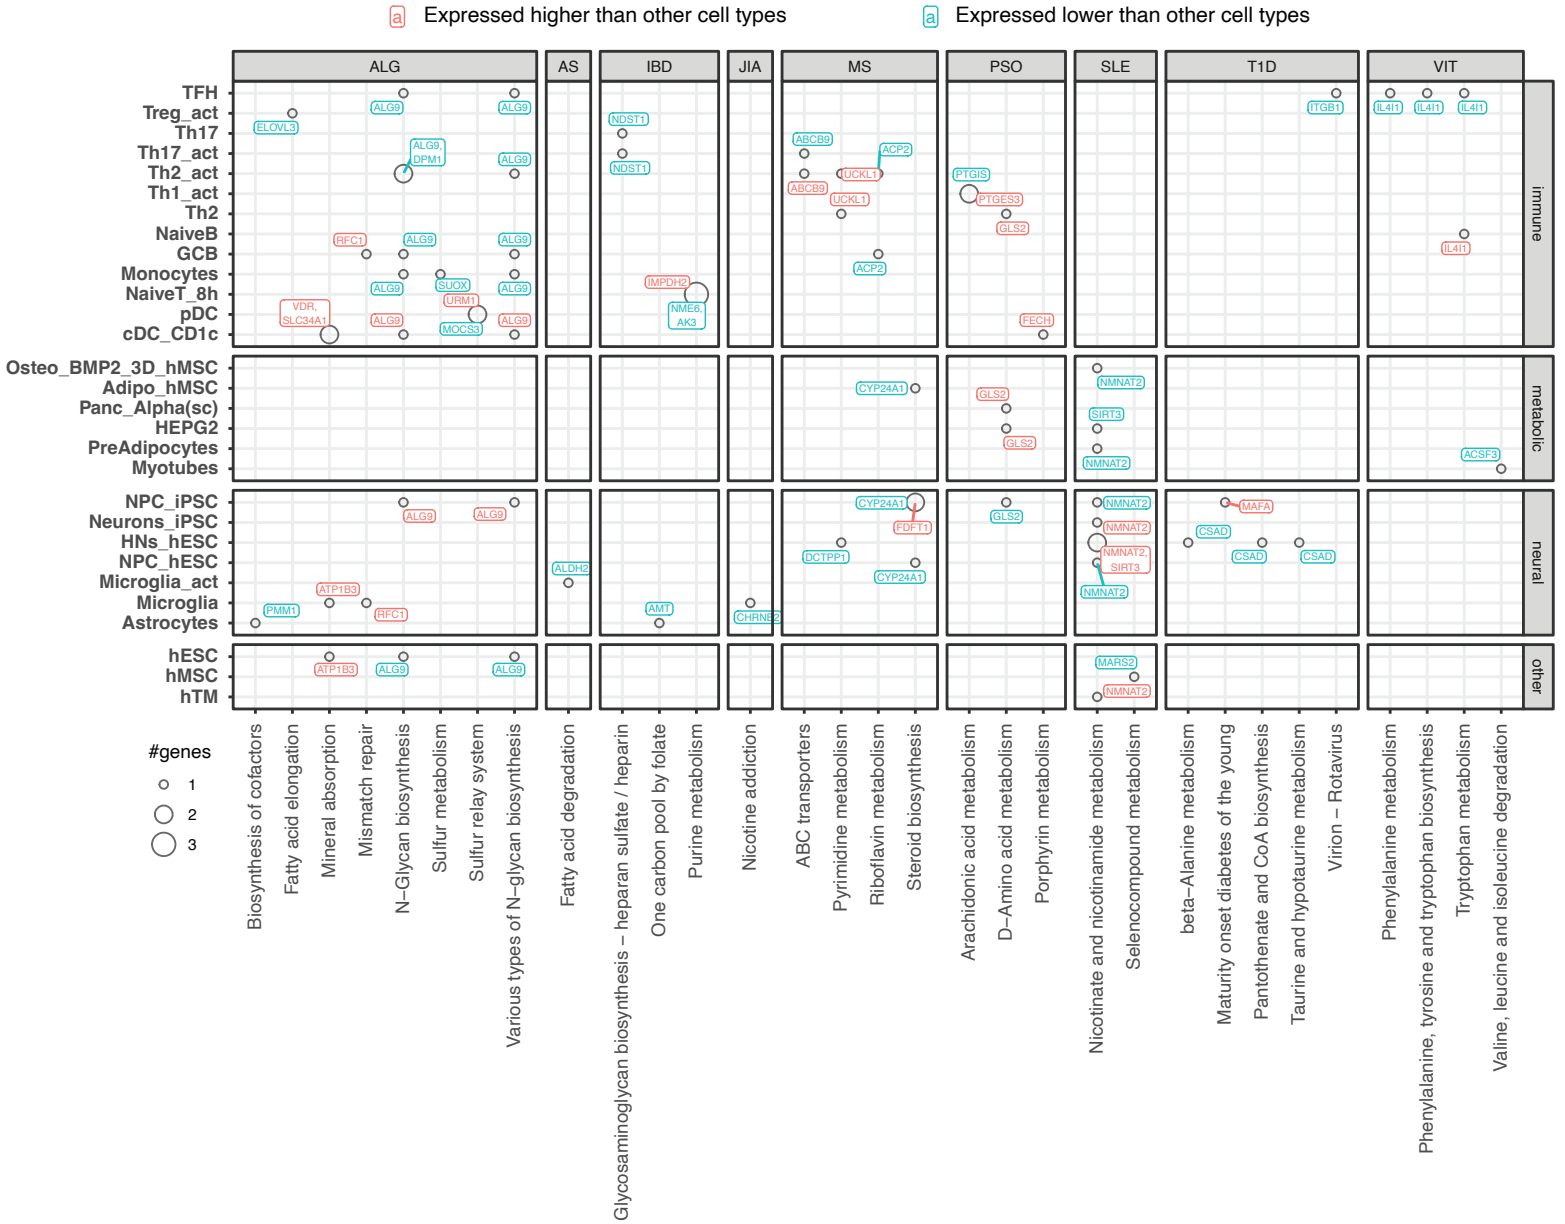

**Figure S9** - Expression of *BLK* in sorted immune cells from RA patients, SLE patients, and healthy subjects measured by bulk RNA-seq<sup>66</sup>. Statistically significant differential expression compared to healthy subjects is denoted by p values.

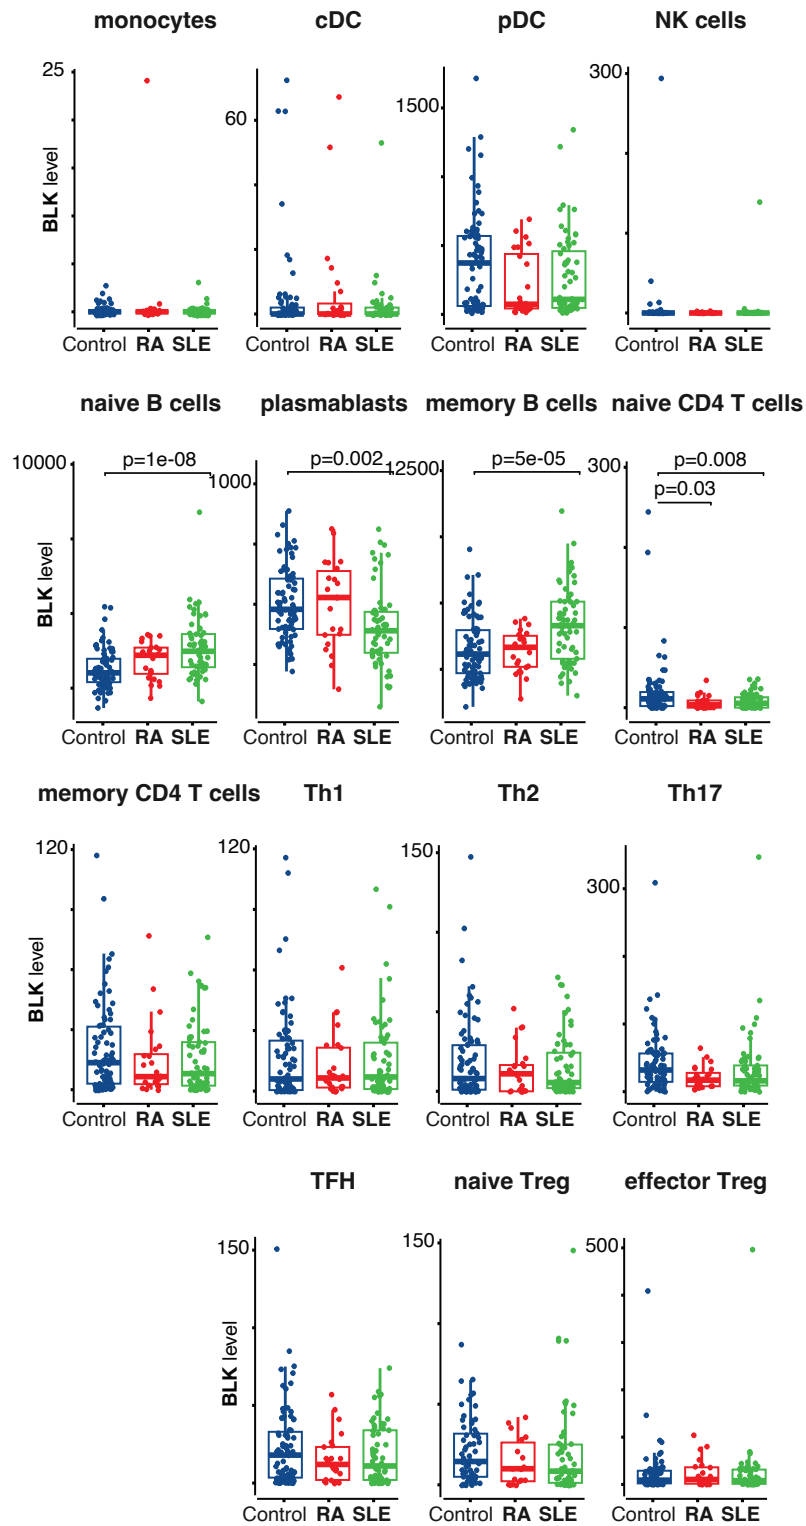

Supplement: media-1.pdf [file media-1.pdf]
