# Supplementary material for: 3D chromatin-based variant-to-gene maps across 57 human cell types reveal the cellular and genetic architecture of autoimmune disease susceptibility
Source: PubMed Central journal article supplement — medRxiv. 2025 May 20:2024.08.12.24311676. Originally published 2024 Aug 12. Preprint. [Version 2] doi: 10.1101/2024.08.12.24311676 (PMC11343244; doi:10.1101/2024.08.12.24311676), 2025-05-20

# Supplementary File 1

Gating strategy for sorting of plasmacytoid dendritic cells (pDC) and CD1c+ dendritic cells (cDC2)

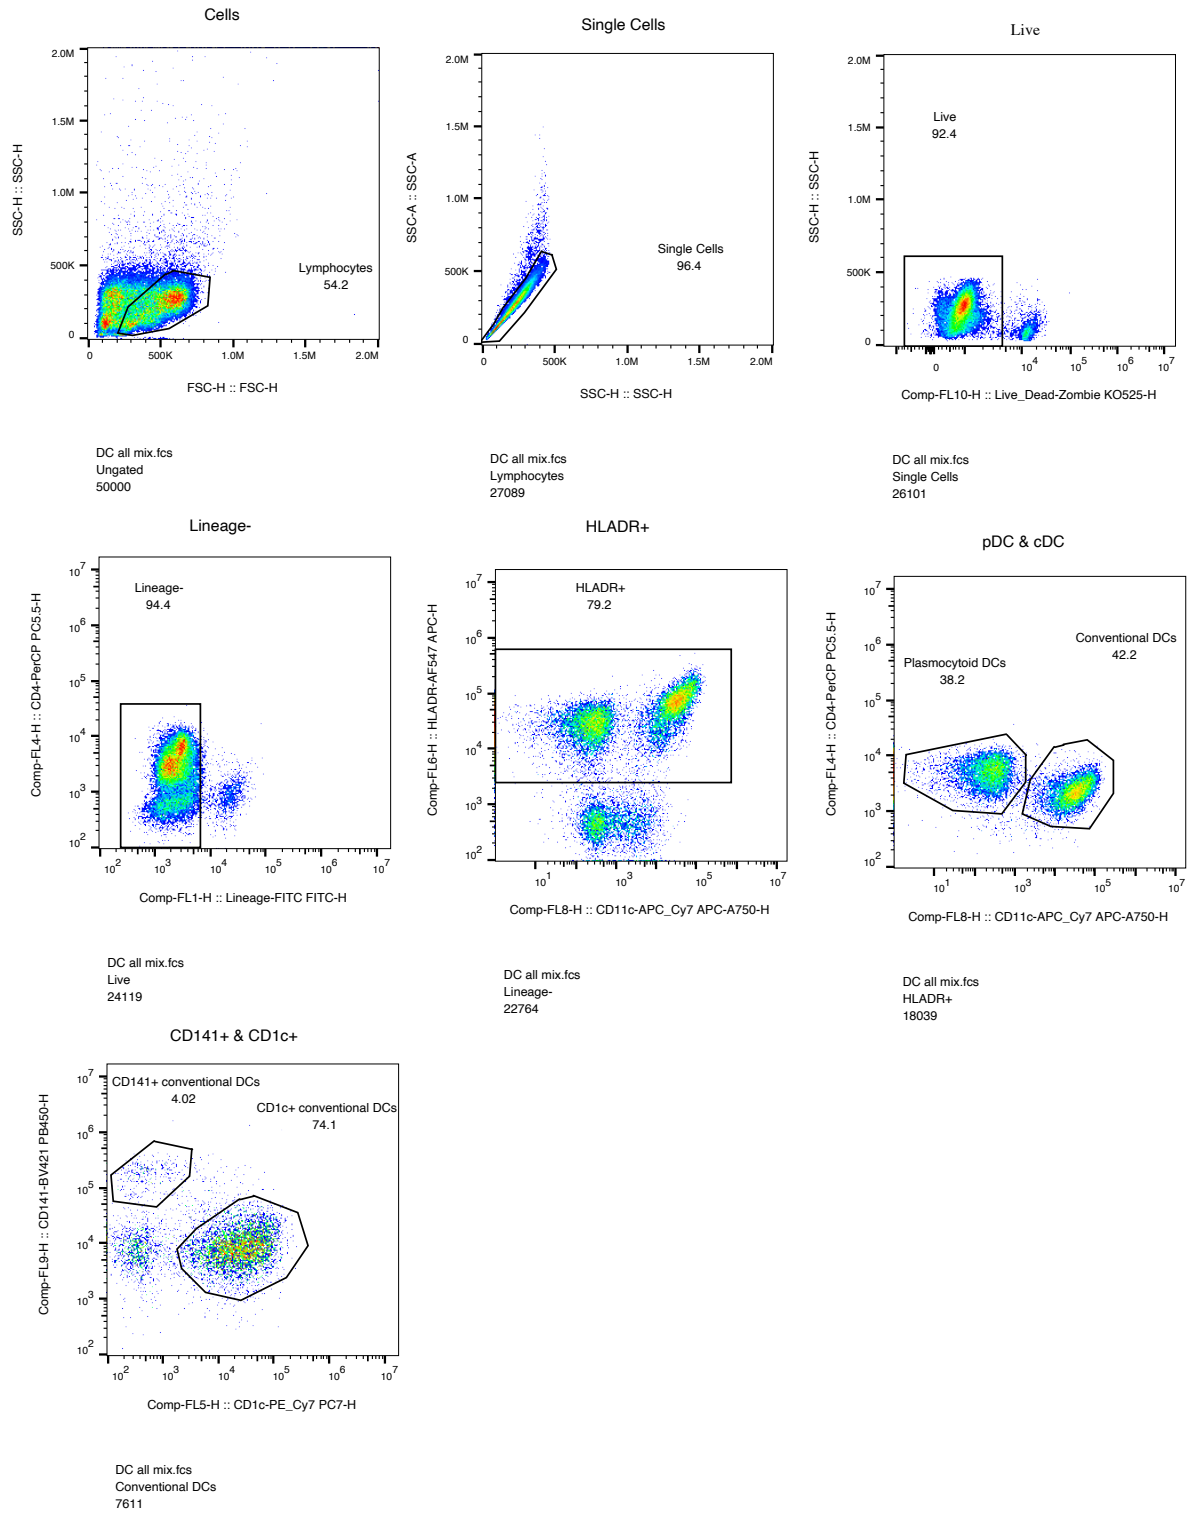

# Gating strategy for sorting of Th1, Th2, Th17, Tr1, and Treg subsets

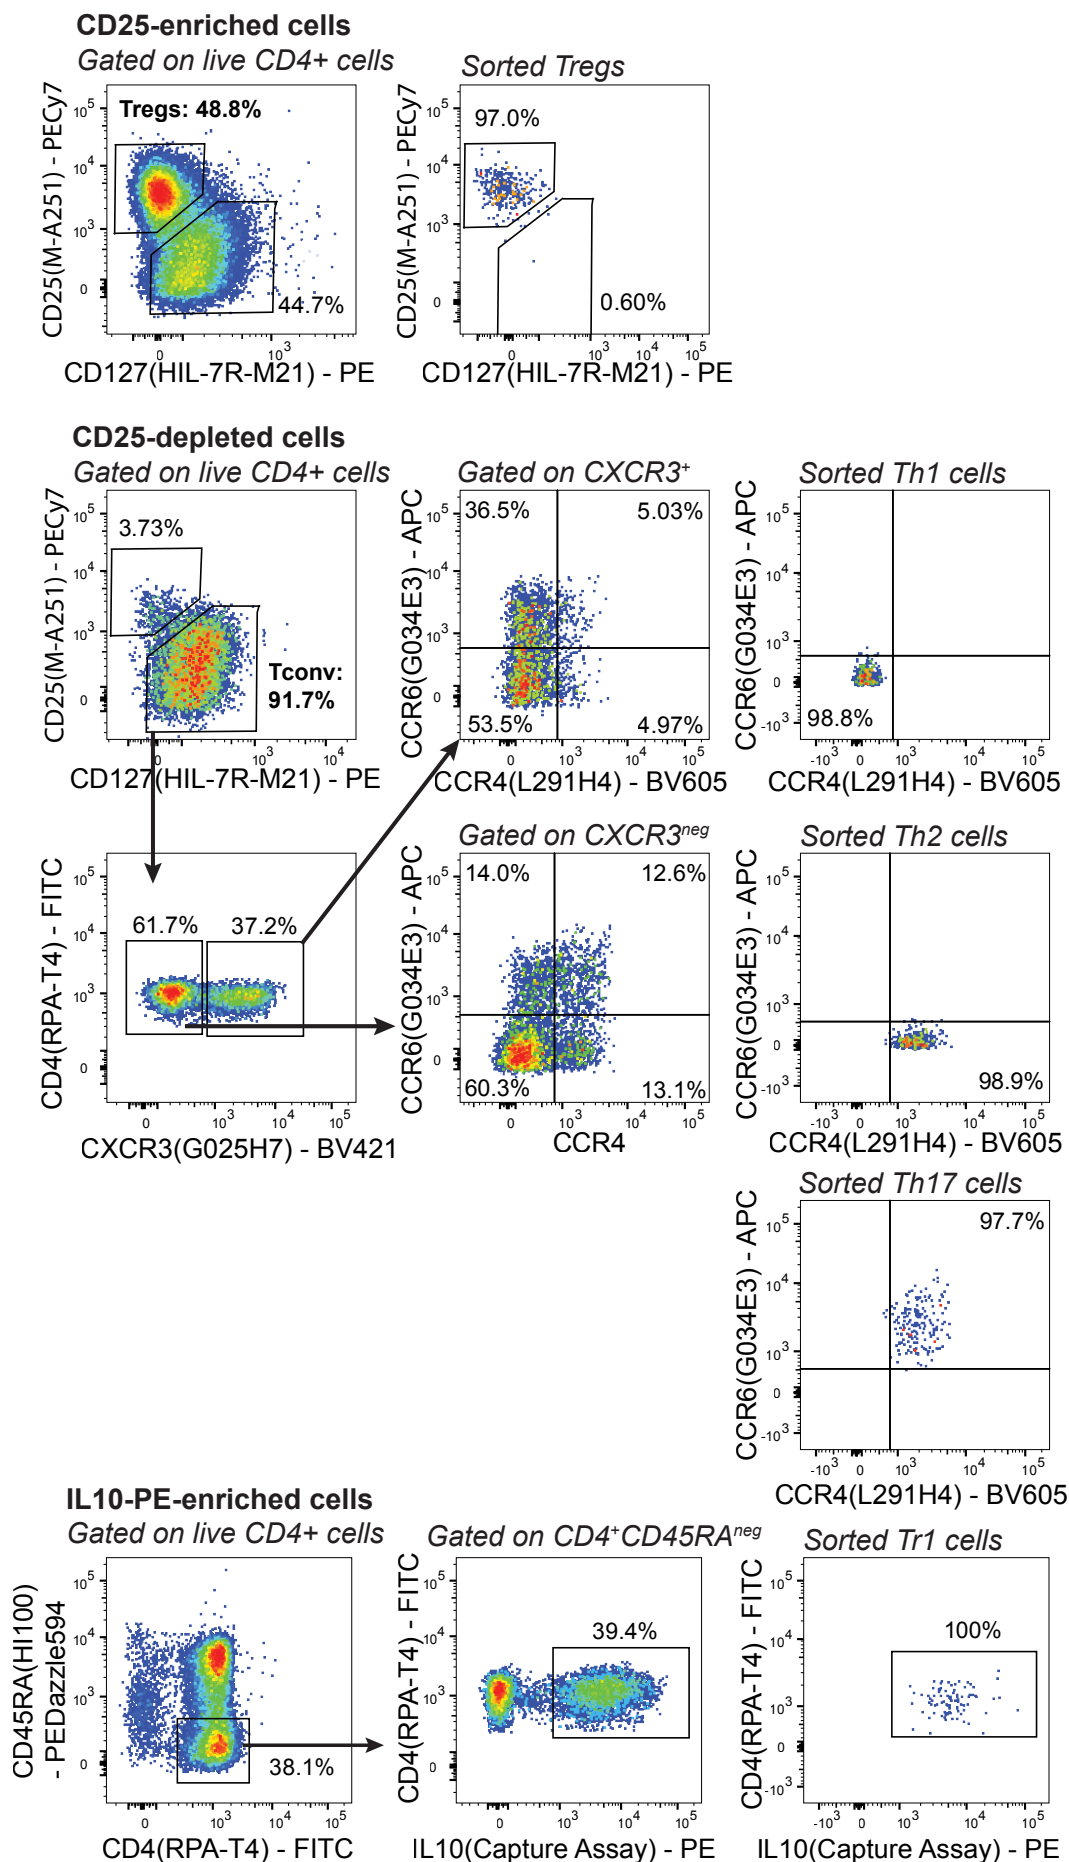

Phenotypic characterization of sorted Th1, Th2, Th17, Tr1, and Treg subsets. See Table S2 for donor info.

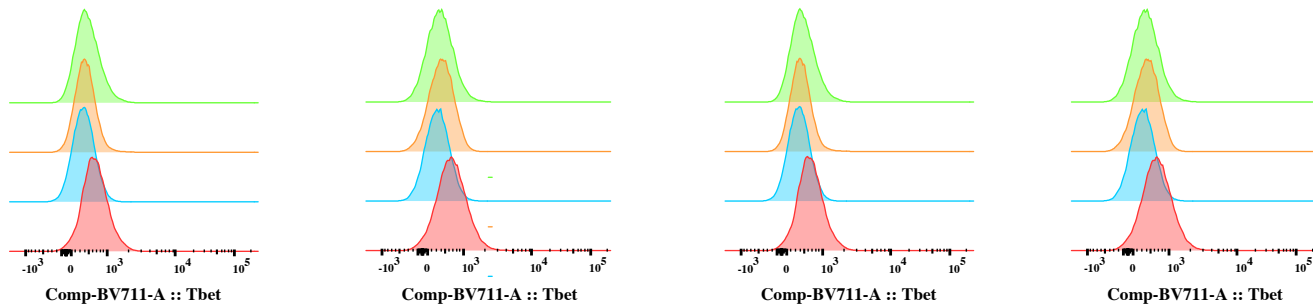

| Sample Name | Geometric Mean : Comp-BV711-A |
|-------------|-------------------------------|
| 1700_Treg   | 489                           |
| 1700_Th17   | 434                           |
| 1700_Th2    | 394                           |
| 1700_Th1    | 673                           |

| Sample Name | Geometric Mean : Comp-BV711-A |
|-------------|-------------------------------|
| 5549_Treg   | 401                           |
| 5549_Th17   | 421                           |
| 5549_Th2    | 337                           |
| 5549_Th1    | 678                           |

| Sample Name | Geometric Mean : Comp-BV711-A |
|-------------|-------------------------------|
| 1700_Treg   | 489                           |
| 1700_Th17   | 434                           |
| 1700_Th2    | 394                           |
| 1700_Th1    | 673                           |

| Sample Name | Geometric Mean : Comp-BV711-A |
|-------------|-------------------------------|
| 5549_Treg   | 401                           |
| 5549_Th17   | 421                           |
| 5549_Th2    | 337                           |
| 5549_Th1    | 678                           |

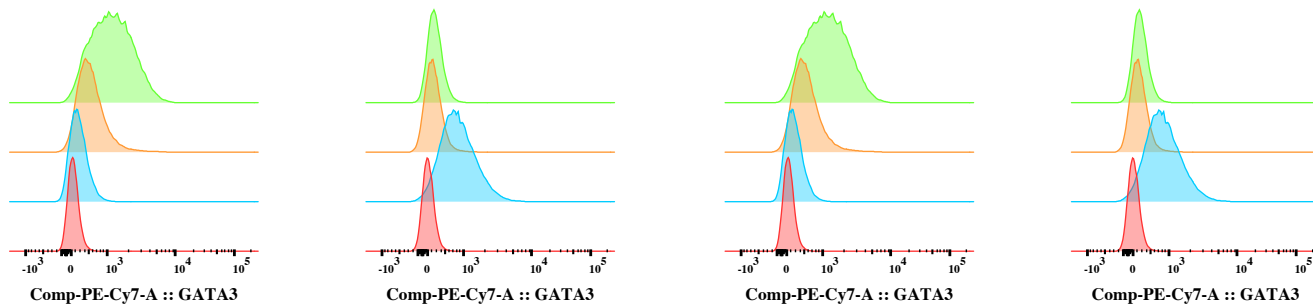

| Sample Name | Geometric Mean : Comp-PE-Cy7-A |
|-------------|--------------------------------|
| 1700_Treg   | 1201                           |
| 1700_Th17   | 572                            |
| 1700_Th2    | 284                            |
| 1700_Th1    | 168                            |

| Sample Name | Geometric Mean : Comp-PE-Cy7-A |
|-------------|--------------------------------|
| 5549_Treg   | 284                            |
| 5549_Th17   | 249                            |
| 5549_Th2    | 864                            |
| 5549_Th1    | 141                            |

| Sample Name | Geometric Mean : Comp-PE-Cy7-A |
|-------------|--------------------------------|
| 1700_Treg   | 1201                           |
| 1700_Th17   | 572                            |
| 1700_Th2    | 284                            |
| 1700_Th1    | 168                            |

| Sample Name | Geometric Mean : Comp-PE-Cy7-A |
|-------------|--------------------------------|
| 5549_Treg   | 284                            |
| 5549_Th17   | 249                            |
| 5549_Th2    | 864                            |
| 5549_Th1    | 141                            |

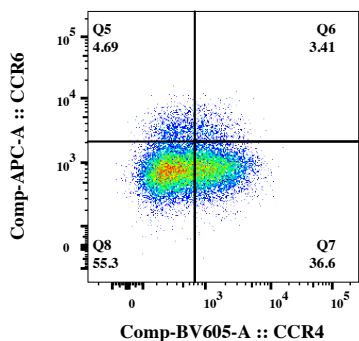

1700\_Th1

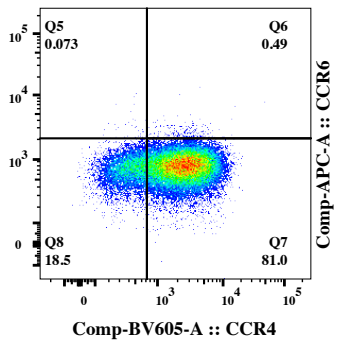

1700\_Th2

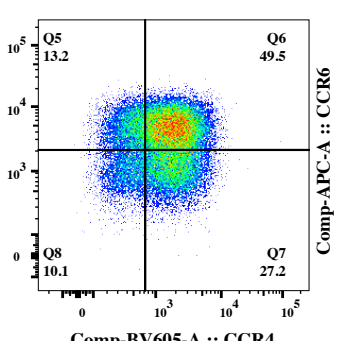

1700\_Th17

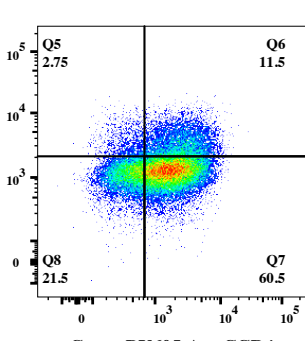

1700\_Treg

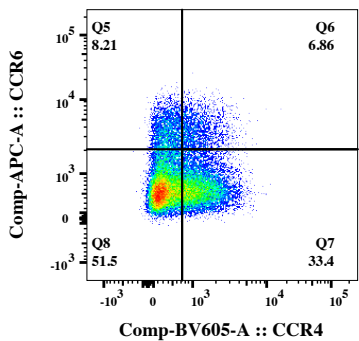

5549\_Th1

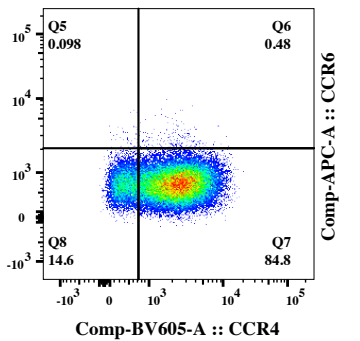

5549\_Th2

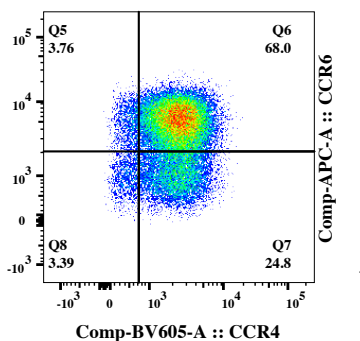

5549\_Th17

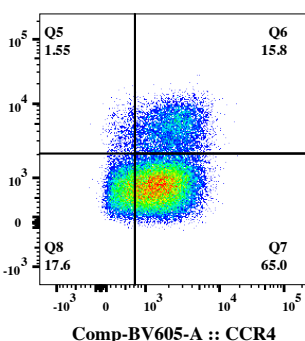

5549\_Treg

Phenotypic characterization of day 14 in vitro expanded Th1, Th2, Th17, Tr1 & Treg subsets.

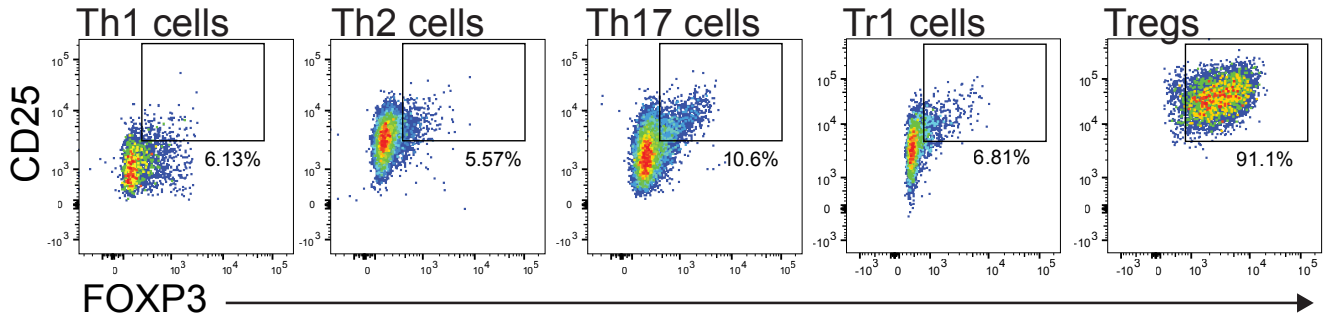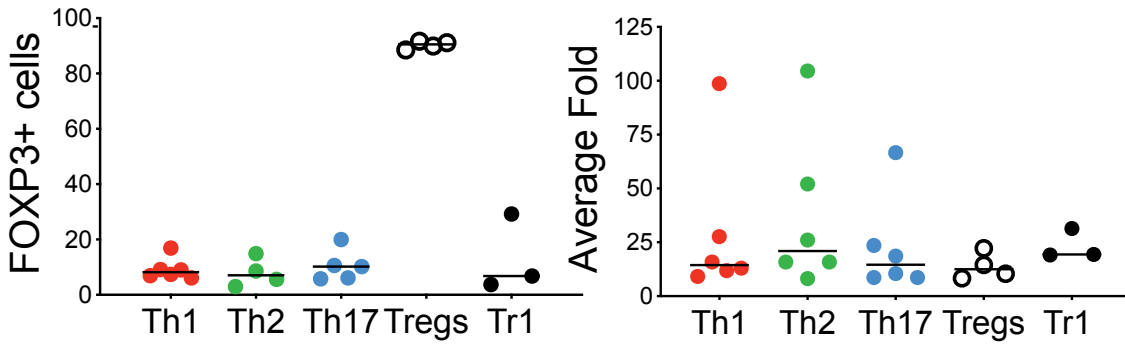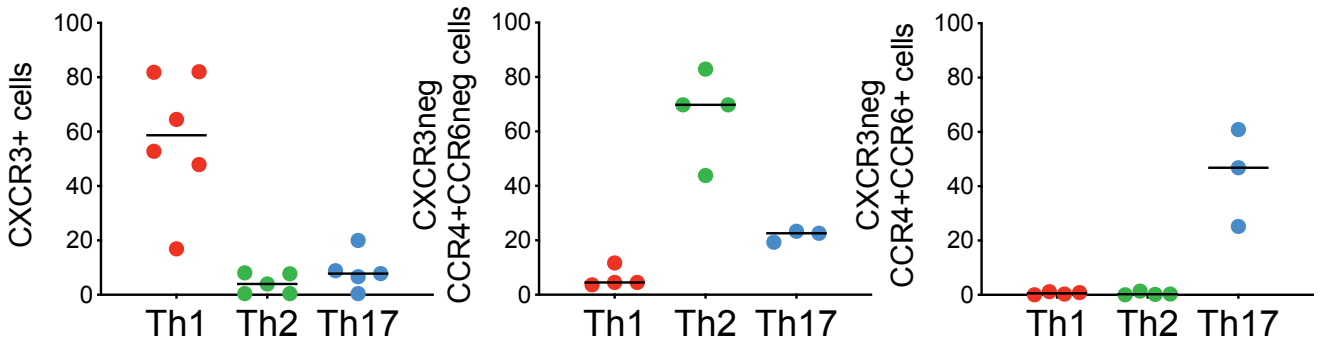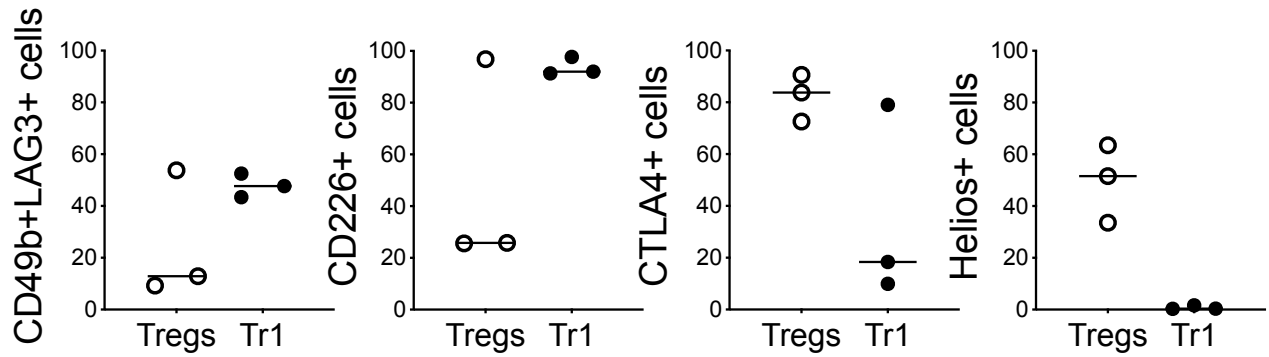

Functional characterization of day 14 in vitro expanded Th1, Th2, and Th17 subsets.

### Th1 cells

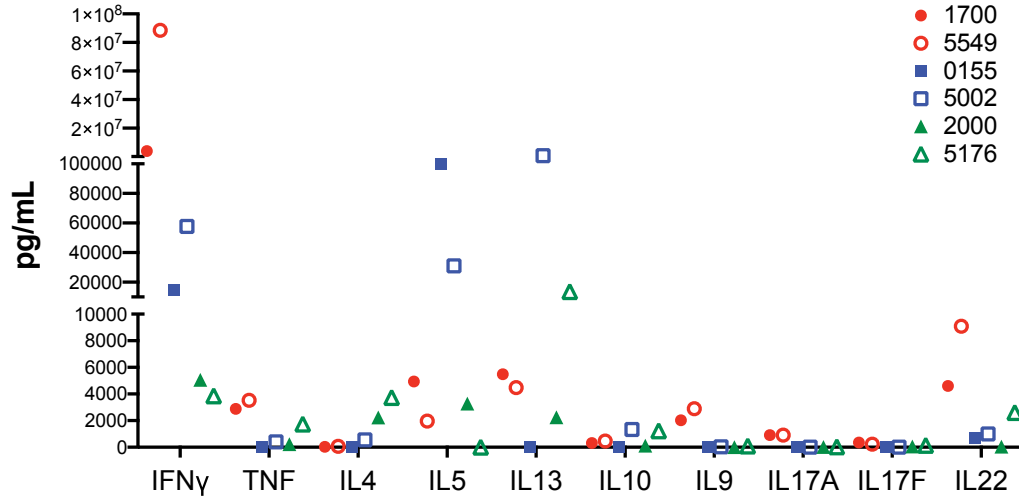

### Th2 cells

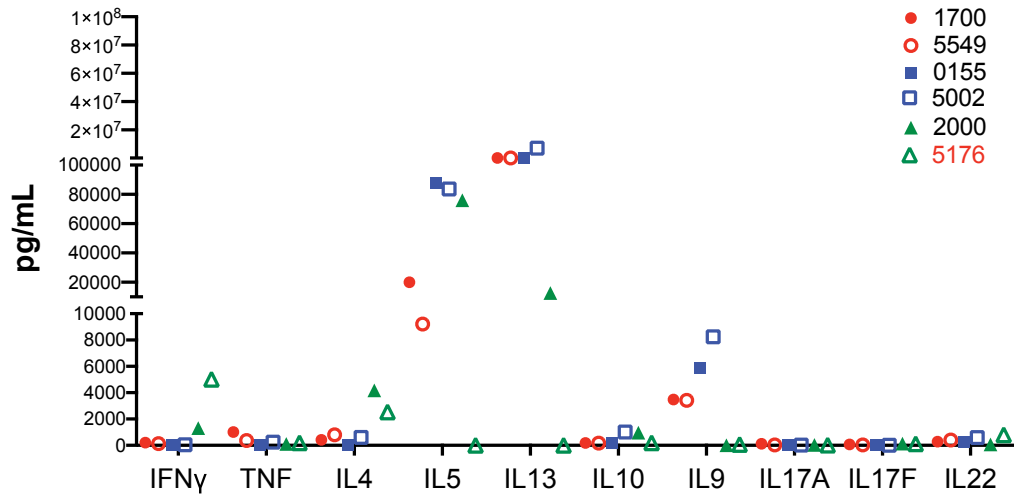

### Th17 cells

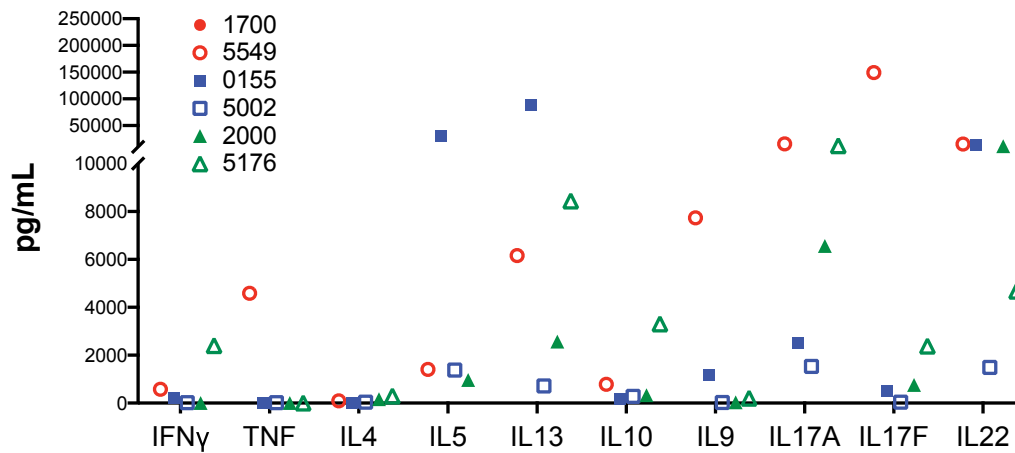

Supplement: media-2.pdf [file media-2.pdf]
