# Supplementary material for: 3D chromatin-based variant-to-gene maps across 57 human cell types reveal the cellular and genetic architecture of autoimmune disease susceptibility
Source: PubMed Central journal article supplement — medRxiv. 2025 May 20:2024.08.12.24311676. Originally published 2024 Aug 12. Preprint. [Version 2] doi: 10.1101/2024.08.12.24311676 (PMC11343244; doi:10.1101/2024.08.12.24311676), 2025-05-20
Supplement: NIHPP2024.08.12.24311676v1-supplement-3.pdf [file NIHPP2024.08.12.24311676v1-supplement-3.pdf]

**Table S1. Data resources of 57 cell types**

**Table S2. Immune cells donors and mAbs details**

**Table S3. 16 autoimmune disorders**

**Table S4. Full LDSC analysis result**

**Table S5. Full variant-to-gene mapping result**

**Table S6. Full KEGG pathway enrichment analysis result**

**Table S7. Full GO-term enrichment analysis result**

**Table S8. Full GTEx whole blood eQTLs colocalization analysis**

**Table S9. Full single-cell eQTLs colocalization analysis**
